# Supplementary material for: Inhibition of Cyclin-Dependent Kinases 8/19 Restricts Bacterial and Virus-Induced Inflammatory Responses in Monocytes
Source: MDPI journal article supplement (doi:10.3390/v15061292), 2023-05-31
Supplement: s1 [file s1]

**A**

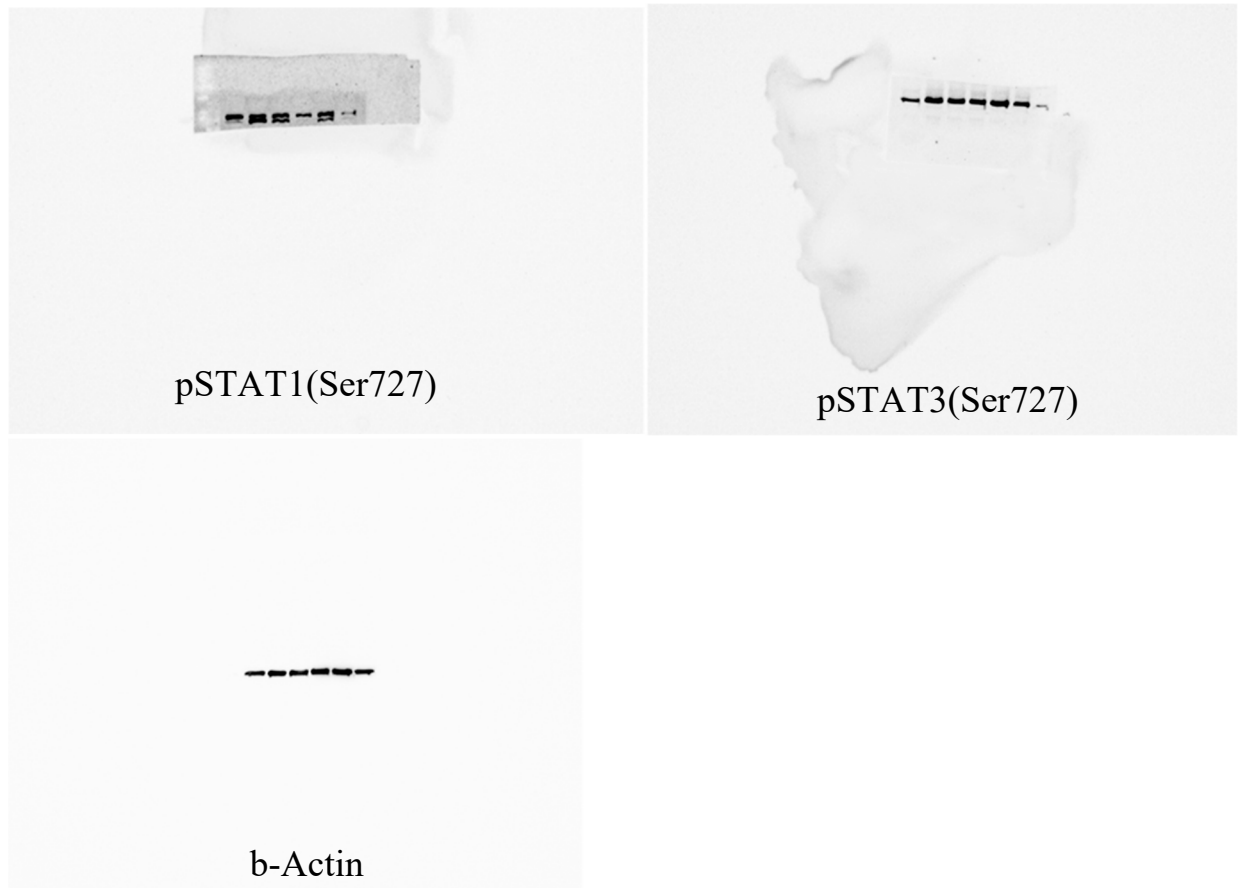

**B**

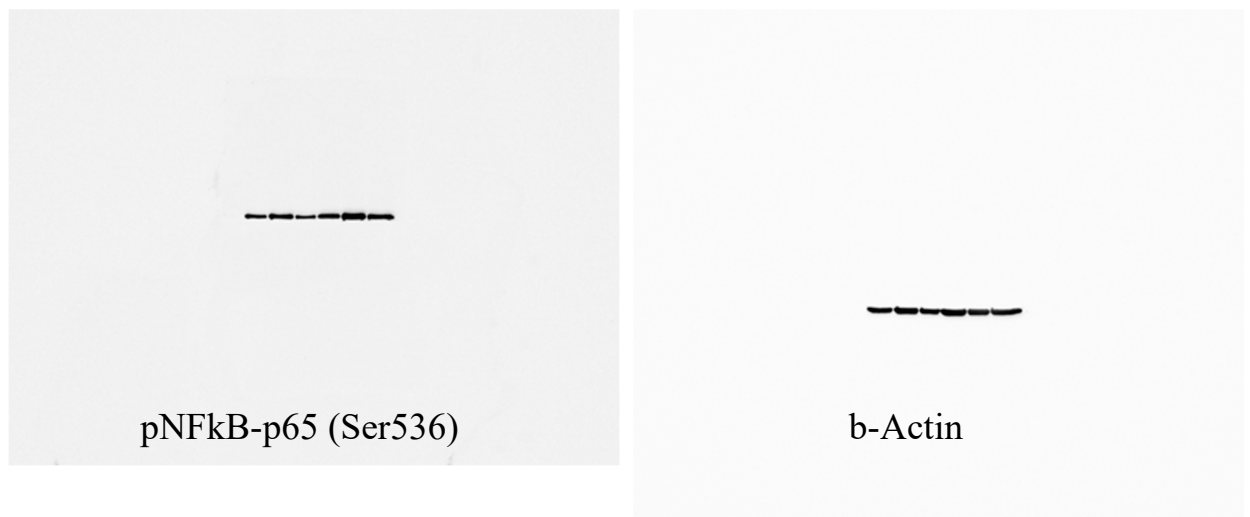

**Supplementary Figure S1.** Original images for western blot experiments presented on Figure 2. A. Experiment 1: pSTAT (Ser727), pSTAT3 (Ser727),  $\beta$ -Actin. B. Experiment 2: pNFkB-p65 (Se536),  $\beta$ -Actin. The order of the samples (from left to right): Untreated (Control), LPS, Virus, Senexin B, Senexin B + LPS, Virus, Virus + Senexin B
